# Supplementary material
Source: PubMed Central journal article supplement (PMC2242688)
Supplement: pnas_0707293105_3.pdf [file pnas_0707293105_3.pdf]

**Table 3. All motifs, classified by their symmetries (elements of each cell are permutations within the class).**

| Motif Class | Motifs in Class                                                                      |
|-------------|--------------------------------------------------------------------------------------|
| 1           |     |
| 2           |     |
| 3           |     |
| 4           |     |
| 5           |     |
| 6           |     |
| 7           |    |
| 8           |     |
| 9           |   |
| 10          |   |
| 11          |   |
| 12          |   |
| 13          |   |
| 14          |  |
| 15          |   |
| 16          |   |
| 17          |   |
| 18          |   |
| 19          |   |
