# Supplementary material
Source: PubMed Central journal article supplement (PMC2242688)
Supplement: pnas_0707293105_4.pdf [file pnas_0707293105_4.pdf]

**Table 4. The model effectively infers characteristic network parameters describing a pre-duplication network and its post-duplication dynamics**

|                     | $P_{si}$ | $P_i$ | $P_+$  | $P_-$ |
|---------------------|----------|-------|--------|-------|
| Network Parameters  | 28.%     | 0.22% | 0.070% | 59.%  |
| Inferred Parameters | 26.%     | 0.23% | 0.071% | 57%   |
| Difference*         | 7.8%     | 2.8%  | 1.5%   | 2.6%  |

\* This simulated network had 900 genes equivalent to the 450 ohnolog pairs in Kellis *et al.* [Kellis M, Birren BW, Lander ES (2004) "Proof and evolutionary analysis of ancient genome duplication in the yeast *Saccharomyces cerevisiae*," *Nature* 428:617-624]. Using network motifs our model extracted the defining parameters of the network with > 90% accuracy.
