# Supplementary material
Source: PubMed Central journal article supplement (PMC2242688)

**A**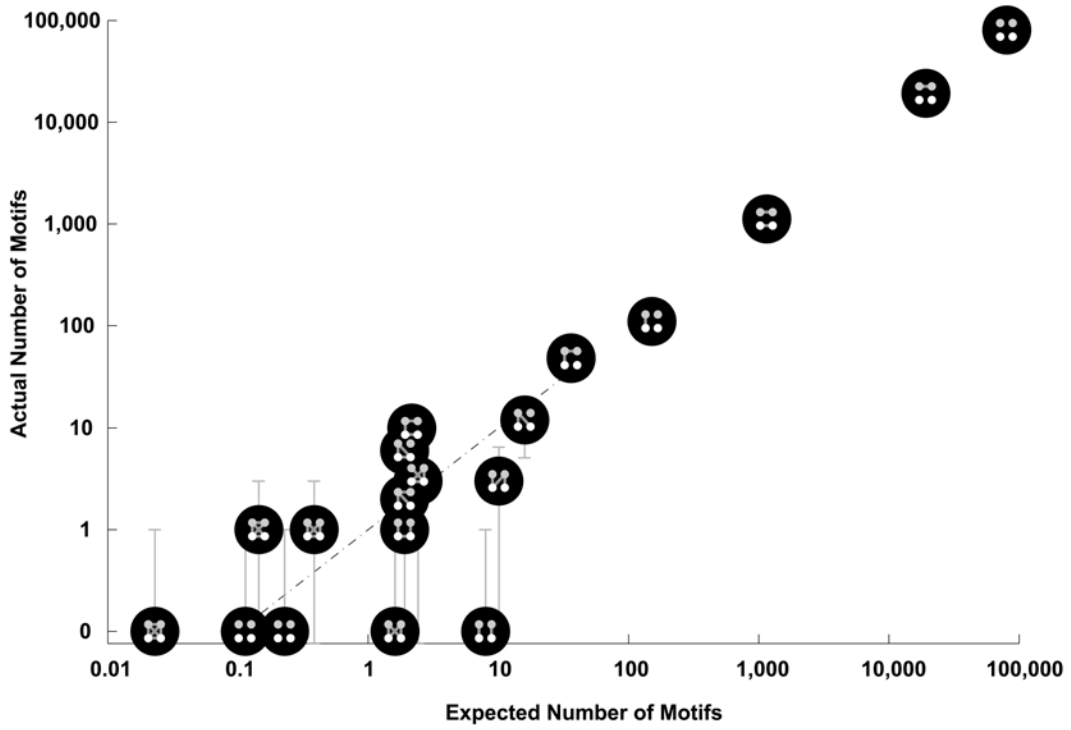**B**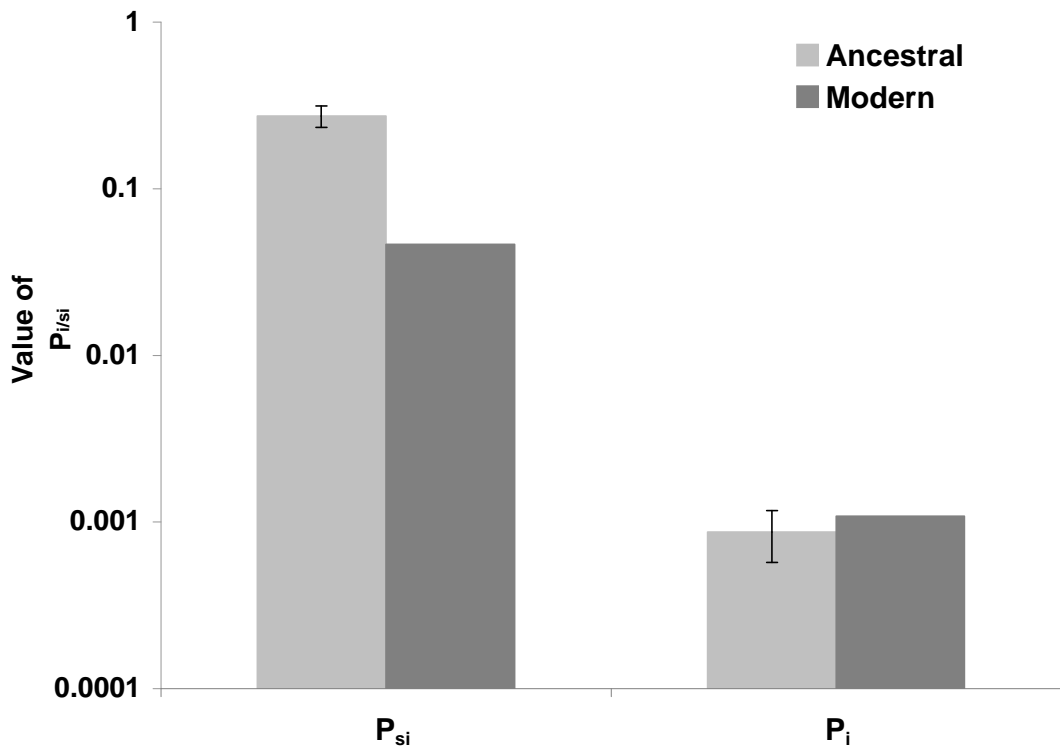

Supplement: pnas_0707293105_1.pdf [file pnas_0707293105_1.pdf]

**A**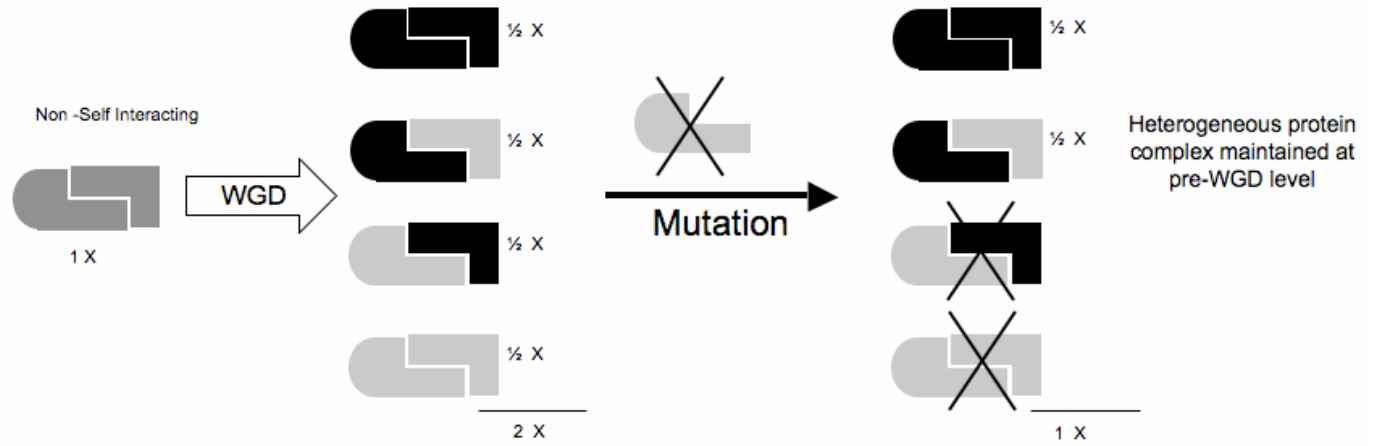**B**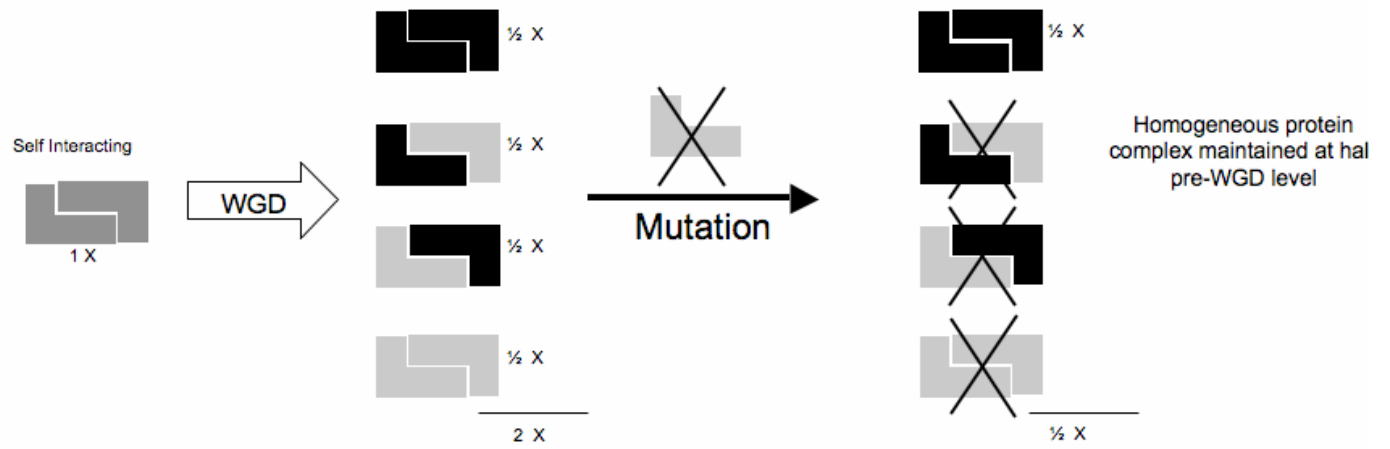

Supplement: pnas_0707293105_2.pdf [file pnas_0707293105_2.pdf]
